# Supplementary material for: Deep eutectic solvent catalyzed Friedel–Crafts alkylation of electron-rich arenes with aldehydes
Source: Royal Society of Chemistry journal article supplement (doi:10.1039/c5ra08950f), 2015-01-01

## Supplementary Data

### Deep eutectic solvent catalyzed Friedel–Crafts alkylation of electron-rich arenes with aldehydes

Ailing Wang<sup>a\*</sup>, Pengfei Xing<sup>a</sup>, Xueliang Zheng<sup>a, c</sup>, Hongyu Cao<sup>b</sup>, Guang Yang<sup>a</sup> and Xuefang Zheng<sup>b, c\*</sup>

*bis(2,4,5-trimethoxyphenyl)phenylmethane(3a)*

White solid m.p.: 127-128 °C; <sup>1</sup>H NMR (400MHz; CDCl<sub>3</sub>): δ 3.63 (s, 6H), 3.66 (s, 6H), 3.88 (s, 6H), 6.08 (s, 1H), 6.43 (s, 2H), 6.54 (s, 2H), 7.05 (d, *J* = 6.0 Hz, 2H), 7.18 (m, 1H), 7.25 (m, 2H); <sup>13</sup>C NMR (100MHz; CDCl<sub>3</sub>): δ 42.6, 56.1, 56.7, 57.0, 98.5, 114.7, 124.7, 125.8, 128.0, 129.0, 142.8, 144.3, 148.1, 151.6.

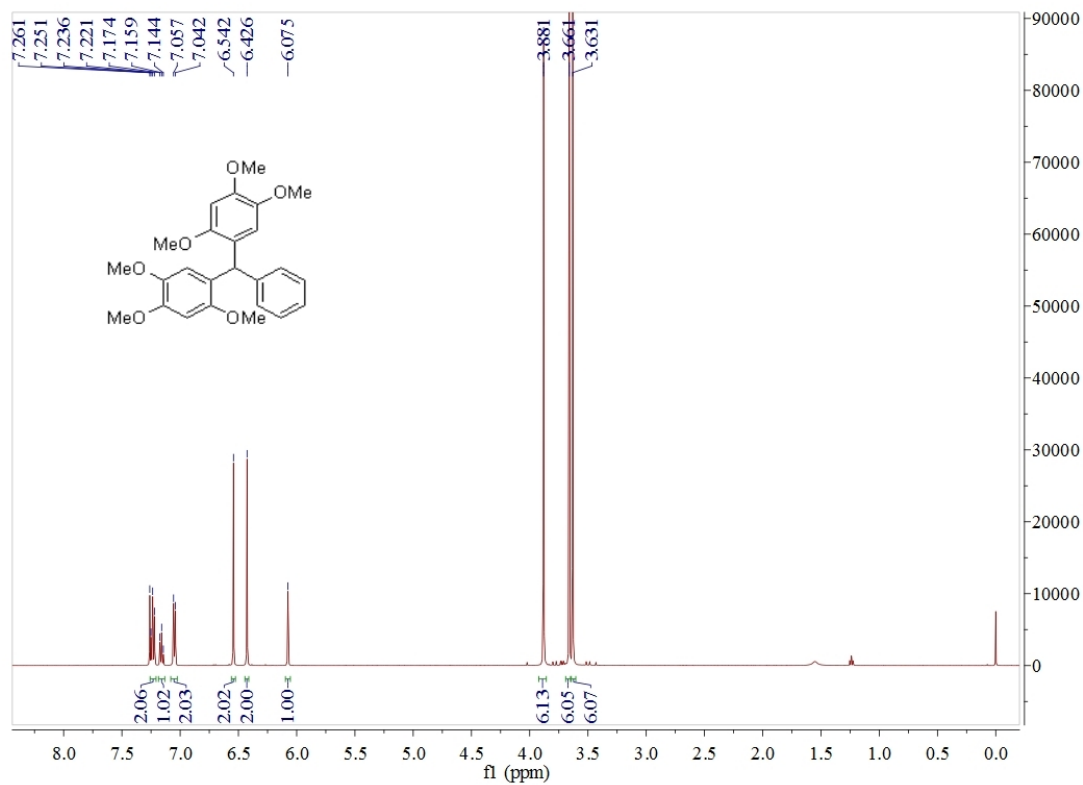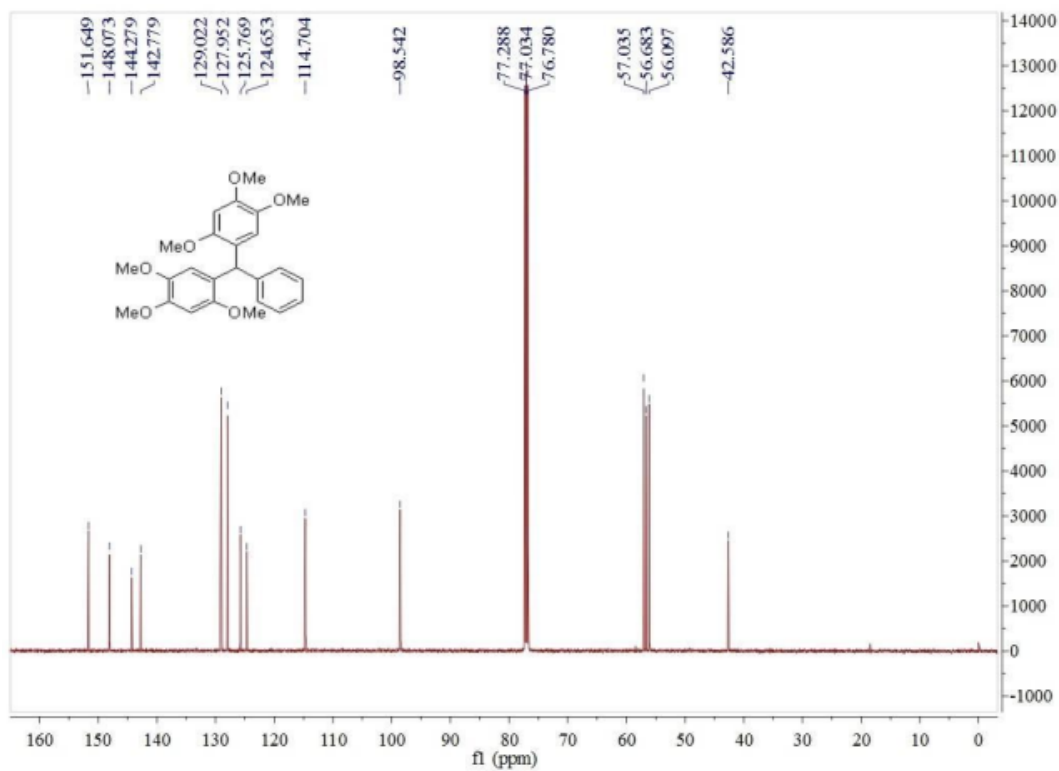

*5,5'-(4-nitrophenyl)methylene)bis(1,2,4-trimethoxybenzene)* (**3b**)

Yellow solid m.p.: 121-123 °C ; <sup>1</sup>H NMR (400MHz; CDCl<sub>3</sub>): δ 3.65 (s, 6H), 3.68 (s, 6H), 3.91 (s, 6H), 6.11 (s, 1H), 6.40 (s, 2H), 6.56 (s, 2H), 7.21 (d, *J* = 8.4 Hz, 2H), 8.10 (d, *J* = 8.6 Hz, 2H); <sup>13</sup>C NMR (100MHz; CDCl<sub>3</sub>): δ 42.8, 55.9, 56.4, 56.6, 97.9, 114.3, 122.2, 123.0, 129.4, 142.7, 146.0, 148.5, 151.4, 152.7.

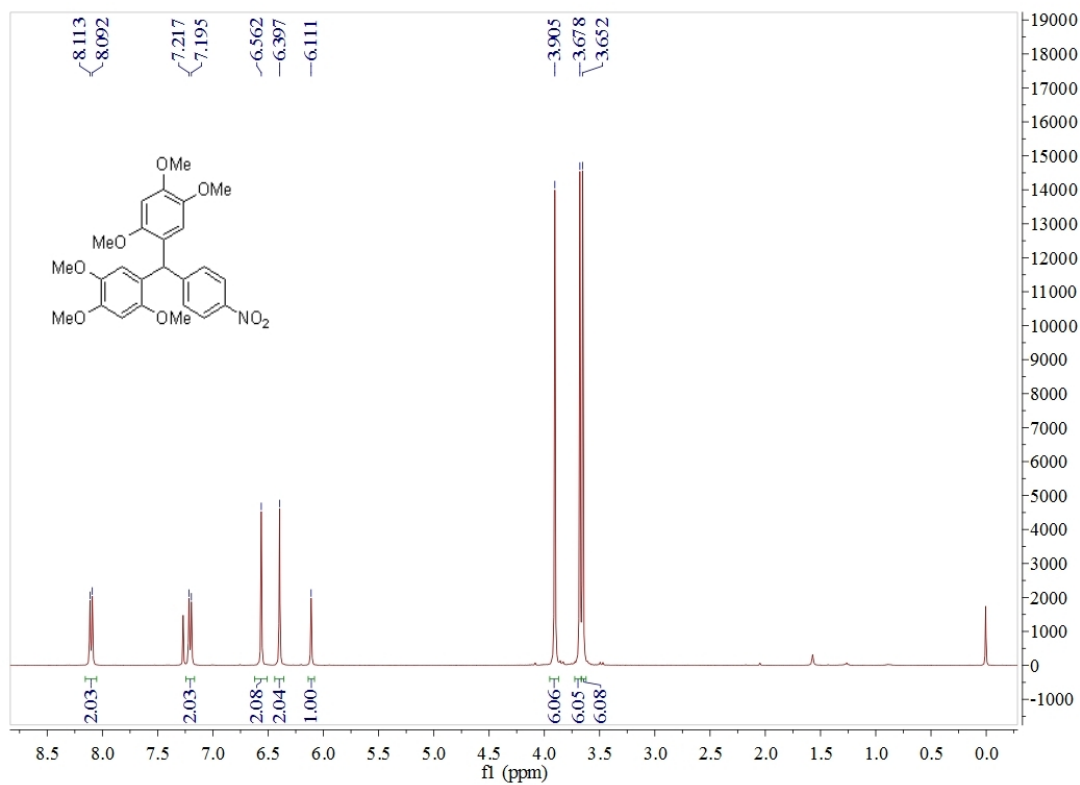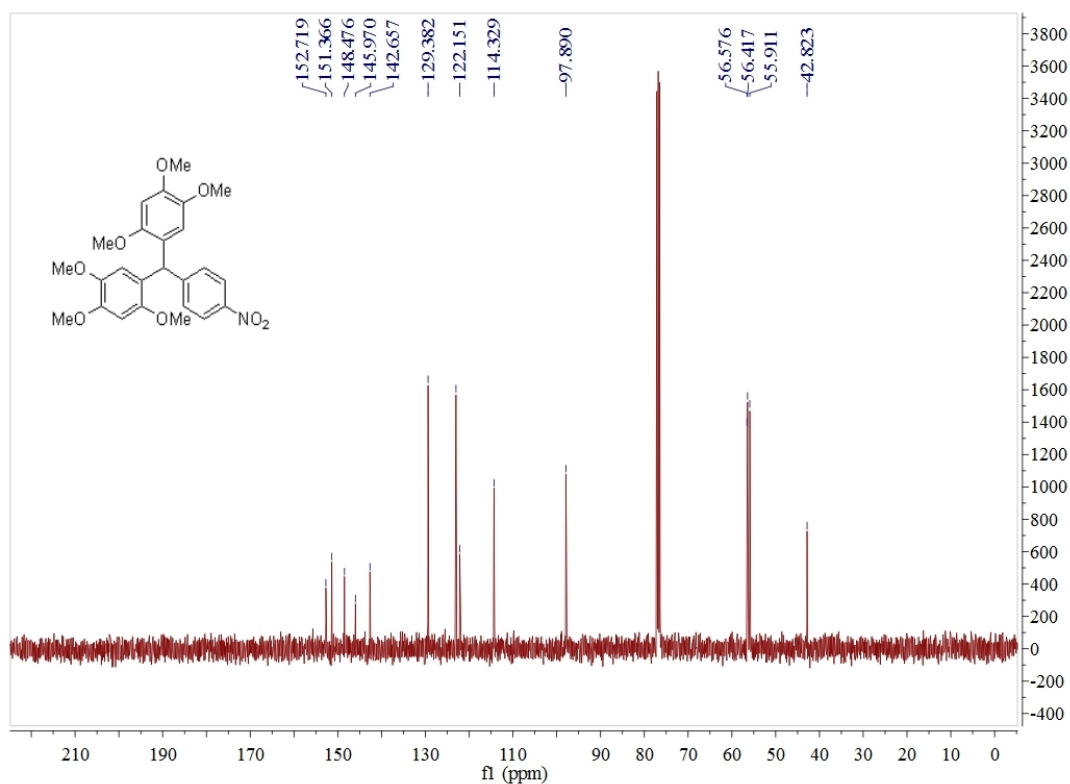

1,1'-((4-chlorophenyl)methylene)bis(2,4,5-trimethoxybenzene) (**3c**)

White solid m.p.: 167-169 °C;  $^1\text{H}$  NMR (400MHz;  $\text{CDCl}_3$ ):  $\delta$  3.65 (s, 6H), 3.67 (s, 6H), 3.90 (s, 6H), 6.03 (s, 1H), 6.40 (s, 2H), 6.55 (s, 2H), 6.98 (d,  $J = 8.0$  Hz, 2H), 7.21 (d,  $J = 8.0$  Hz, 2H);  $^{13}\text{C}$  NMR (100MHz;  $\text{CDCl}_3$ ):  $\delta$  41.9, 55.9, 56.5, 56.7, 98.1, 114.3, 123.6, 127.9, 130.1, 131.2, 142.6, 142.8, 148.0, 151.4.

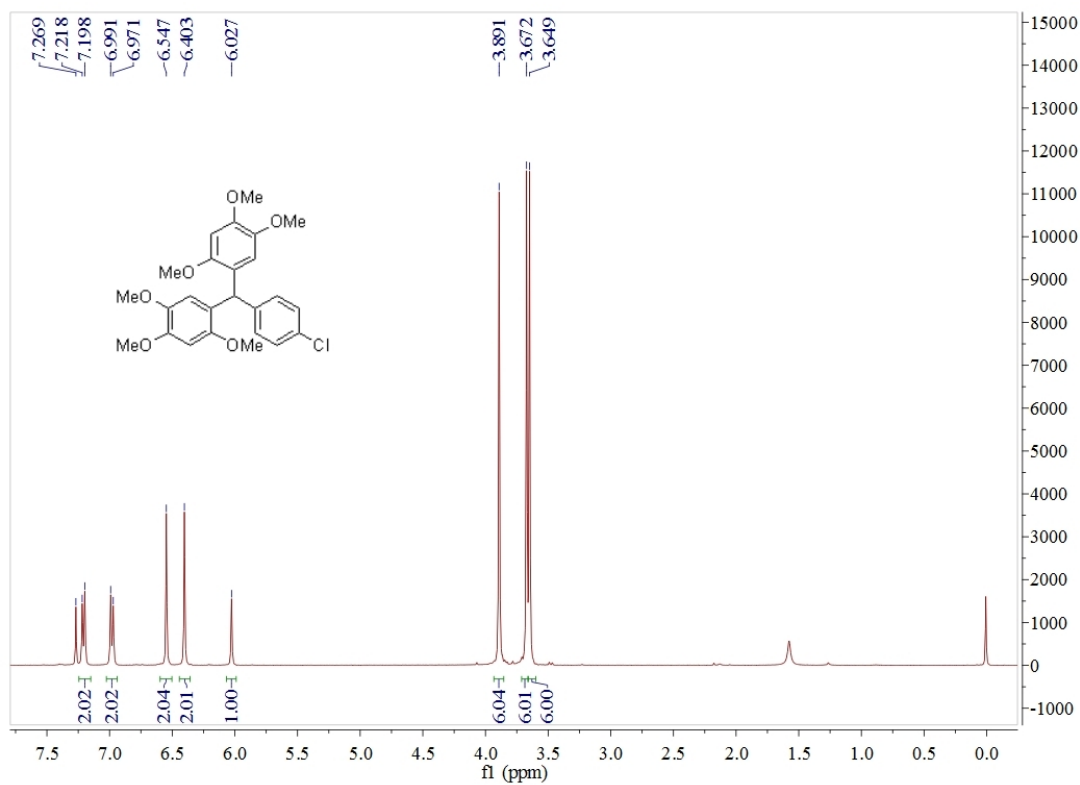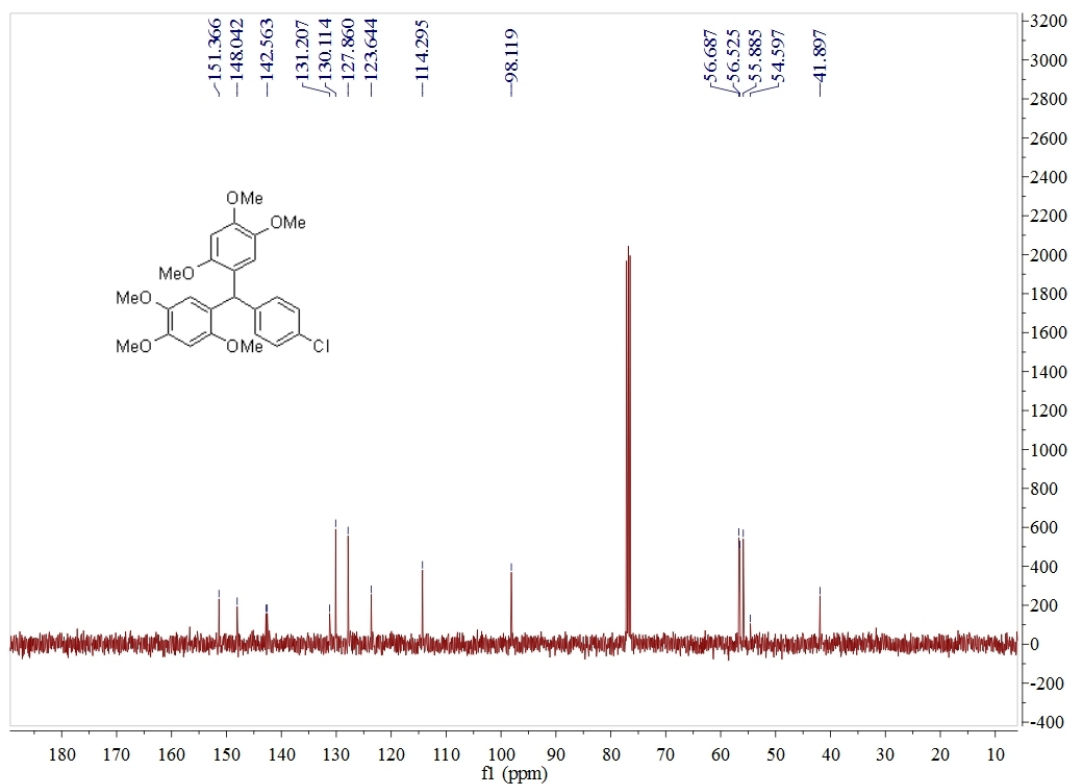

**5,5'-(*p*-tolylmethylene)bis(1,2,4-trimethoxybenzene) (3d)**

White solid m.p.: 141-143 °C; <sup>1</sup>H NMR (400MHz; CDCl<sub>3</sub>): δ 2.31 (s, 3H), 3.65 (s, 6H), 3.67 (s, 6H), 3.88 (s, 6H), 6.05 (s, 1H), 6.45 (s, 2H), 6.54 (s, 2H), 6.94(d, *J* = 8.0 Hz, 2H), 7.05 (d, *J* = 8.0 Hz, 2H); <sup>13</sup>C NMR (100MHz; CDCl<sub>3</sub>): δ 20.8, 41.9, 55.9, 56.5, 56.9, 98.4, 114.5, 124.7, 128.5, 128.7, 134.9, 140.9, 142.6, 147.8, 151.4.

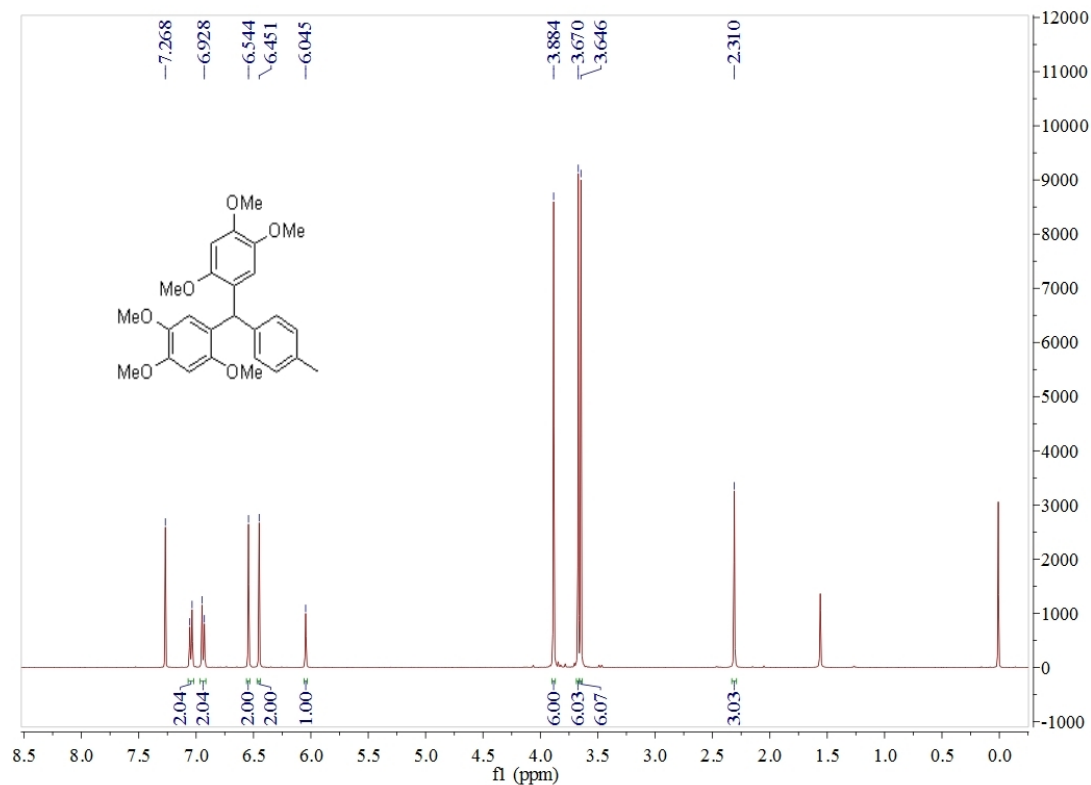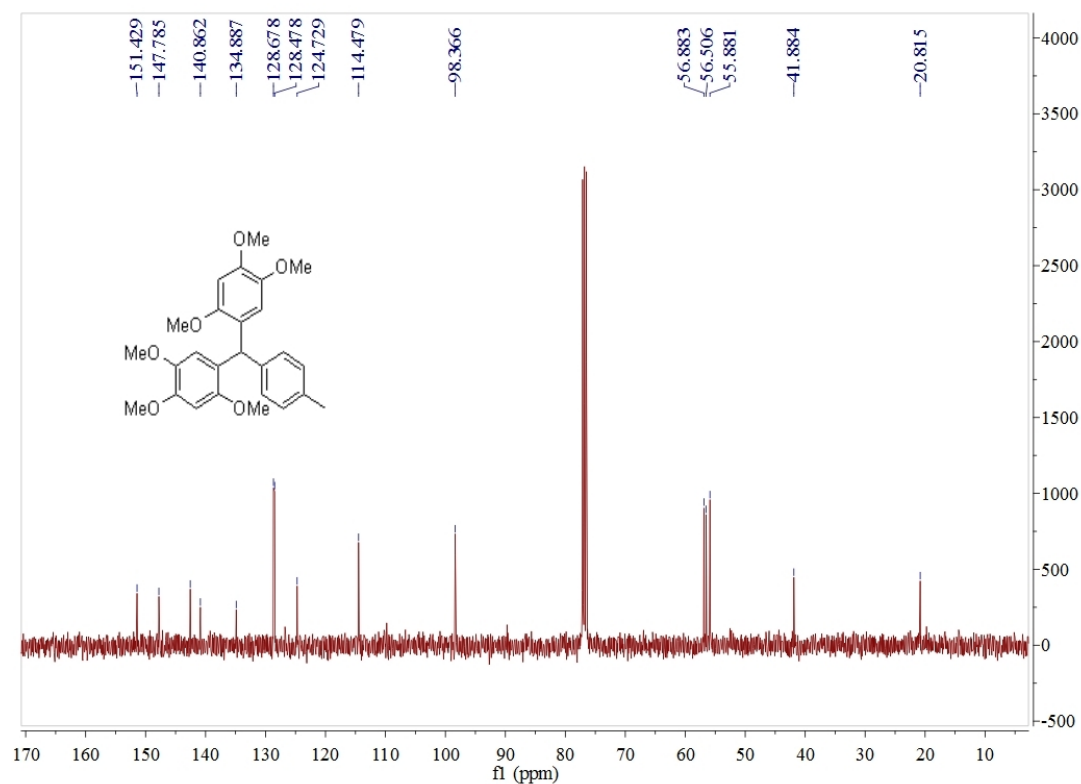

*bis(2,4,5-trimethoxyphenyl)(4-methoxyphenyl)methane(3e)*

White solid m.p.: 130-132 °C; <sup>1</sup>H NMR (400MHz; CDCl<sub>3</sub>): δ 3.65 (s, 6H), 3.67 (s, 6H), 3.79 (s, 3H), 3.89 (s, 6H), 6.02 (s, 1H), 6.44 (s, 2H), 6.55 (s, 2H), 6.79 (d, *J* = 8.6 Hz, 2H), 6.97 (d, *J* = 8.6 Hz, 2H); <sup>13</sup>C NMR (100MHz; CDCl<sub>3</sub>): δ 41.5, 55.0, 55.9, 56.5, 56.7, 98.4, 113.2, 114.4, 124.8, 129.7, 136.1, 142.6, 147.8, 151.5, 157.4.

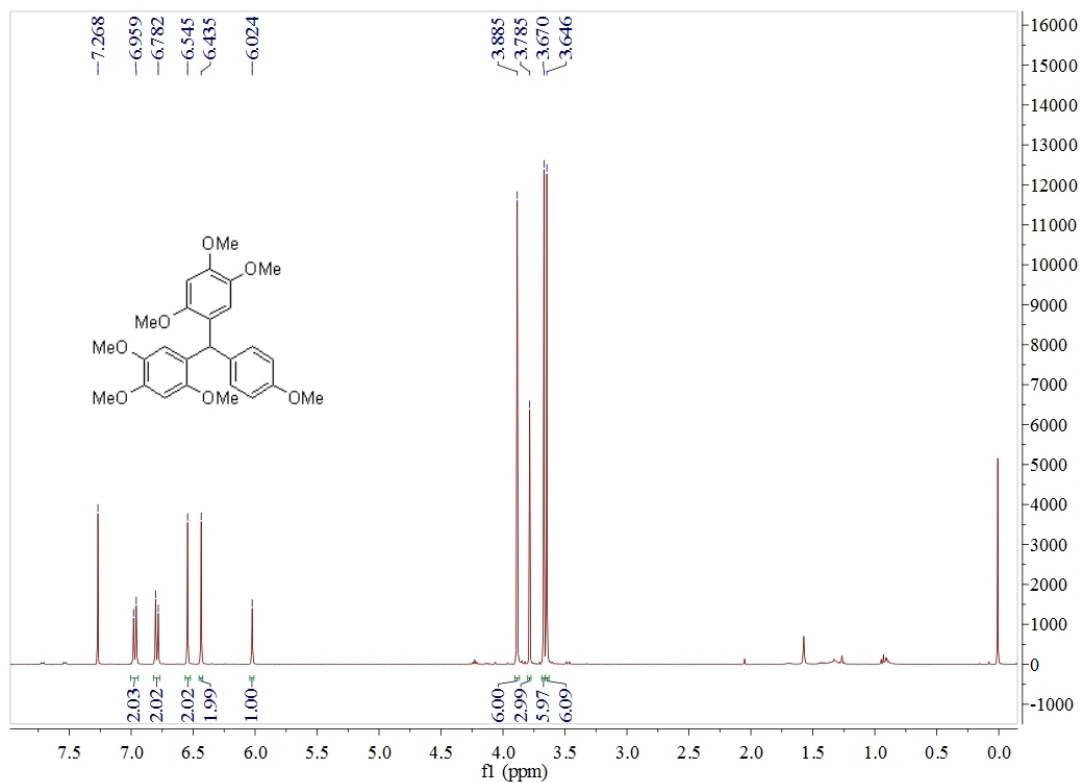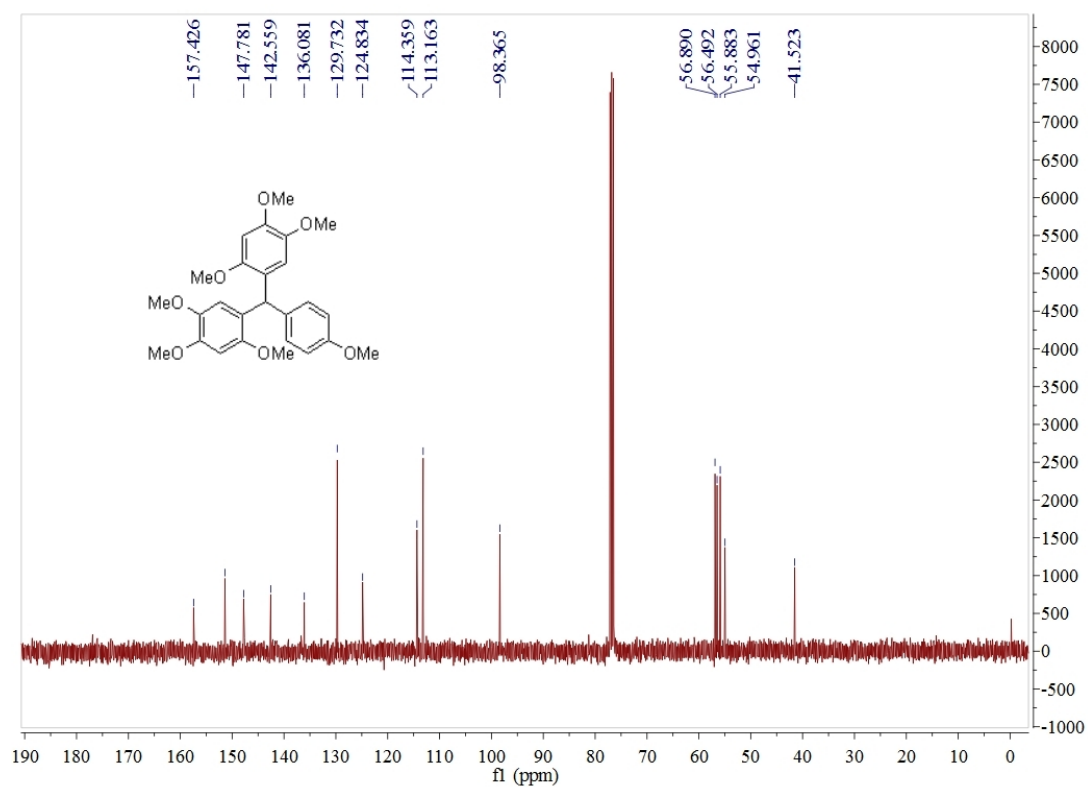

**5,5'-(4-fluorophenyl)methylene)bis(1,2,4-trimethoxybenzene)(3f)**

White solid m.p.: 127-128 °C; <sup>1</sup>H NMR (400MHz; CDCl<sub>3</sub>): δ 3.64 (s, 6H), 3.67 (s, 6H), 3.89 (s, 6H), 6.04 (s, 1H), 6.40 (s, 2H), 6.55 (s, 2H), 6.91-6.95 (m, 2H), 6.70-7.03 (m, 2H); <sup>13</sup>C NMR (100MHz; CDCl<sub>3</sub>): δ 41.7, 55.9, 56.5, 56.7, 98.3, 114.4, 114.6, 124.1, 130.1, 130.2, 139.8, 148.0, 151.4. HRMS Calcd for C<sub>25</sub>H<sub>27</sub>O<sub>6</sub>F: [M+Na]<sup>+</sup>, 465.1684; Found: 465.1682.

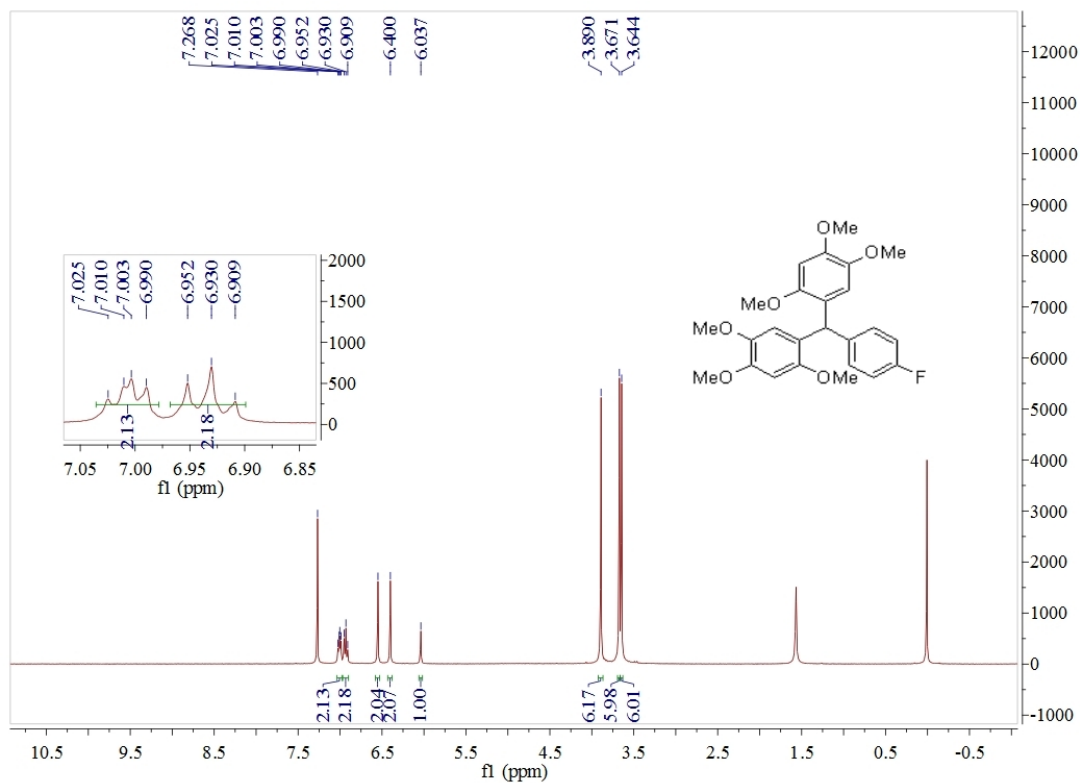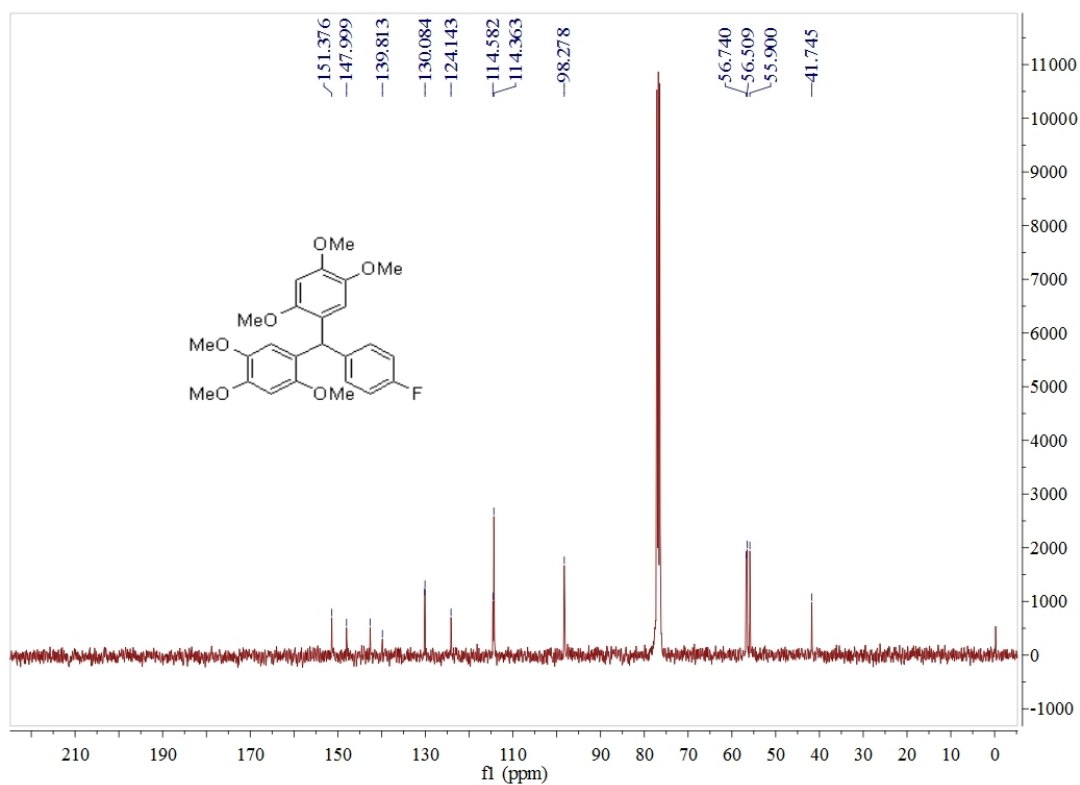

5,5'-((3-(trifluoromethyl)phenyl)methylene)bis(1,2,4-trimethoxybenzene) (**3g**)

White solid m.p.: 135-136 °C; <sup>1</sup>H NMR (400MHz; CDCl<sub>3</sub>): δ 3.65 (s, 6H), 3.67 (s, 6H), 3.90 (s, 6H), 6.09(s, 1H), 6.41 (s, 2H), 6.56 (s, 2H), 7.22 (d, J=7.6Hz, 1H), 7.34-7.37 (m, 2H), 7.44 (d, J=7.6Hz, 1H); <sup>13</sup>C NMR (100MHz; CDCl<sub>3</sub>): δ 42.5, 55.9, 56.5, 56.6, 98.1, 114.4, 122.4, 123.1, 128.1, 142.6, 145.4, 148.2, 151.4. HRMS Calcd for C<sub>26</sub>H<sub>27</sub>O<sub>6</sub>F<sub>3</sub>: [M+Na]<sup>+</sup>, 515.1652; Found: 515.1671.

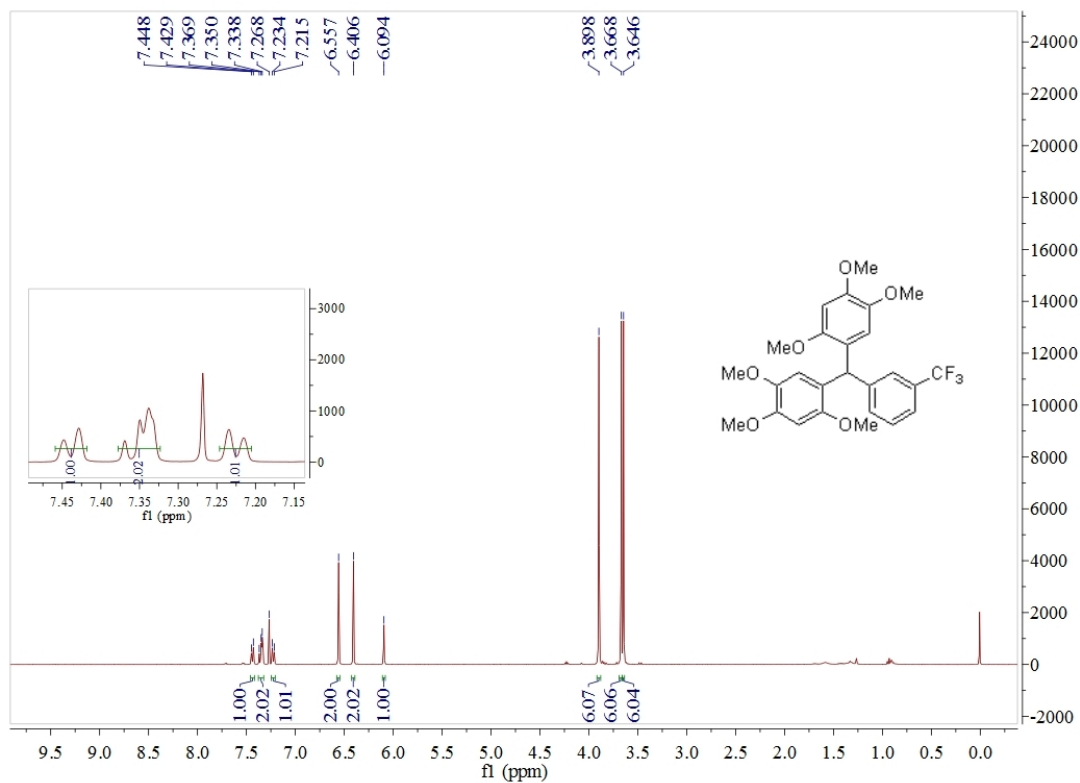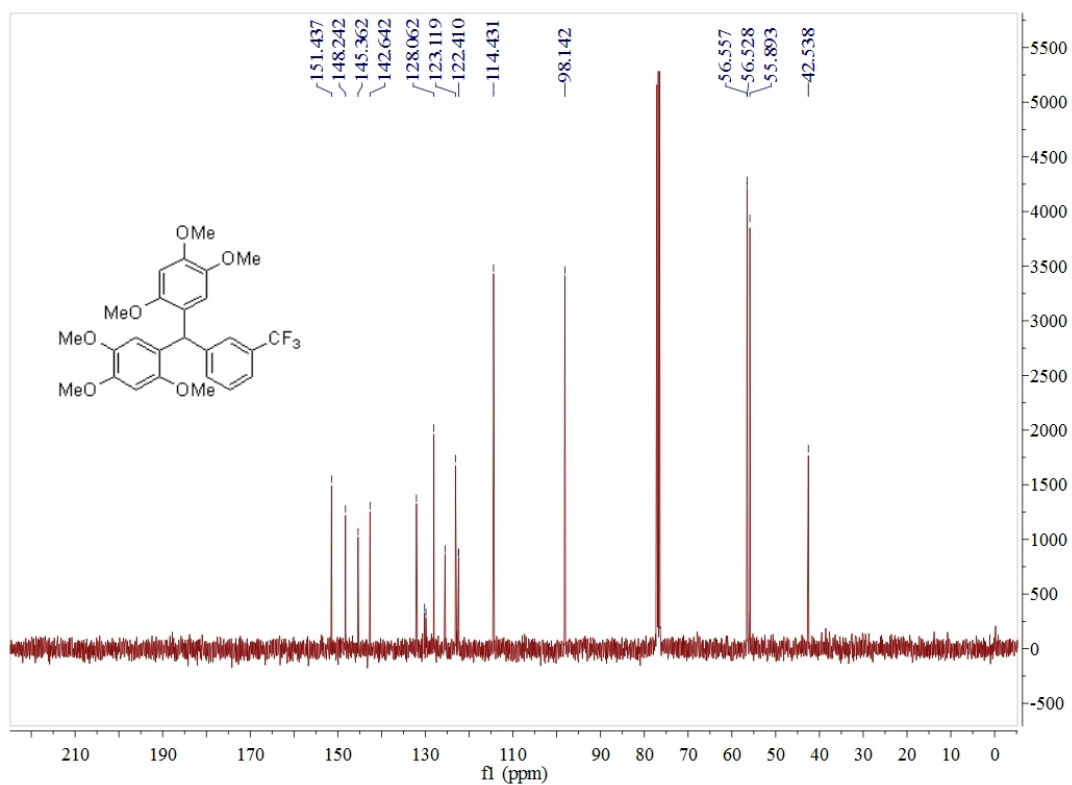



2''-Oxy-2.4.5.2'.4'.5'-hexamethoxy-triphenylmethan (**3h**)

White solid m.p.: 169-170 °C; <sup>1</sup>H NMR (400MHz; DMSO-d<sub>6</sub>): δ 3.47 (s, 6H), 3.61 (s, 6H), 3.77 (s, 6H), 6.12 (s, 1H), 6.27 (s, 2H), 6.60-6.67 (m, 4H), 6.73 (d, J = 8.0 Hz, 1H), 6.99 (t, J = 8.0 Hz, 1H), 9.06 (s, 1H); <sup>13</sup>C NMR (100MHz; DMSO-d<sub>6</sub>): δ 36.4, 56.4, 57.4, 99.7, 115.4, 116.0, 118.9, 124.5, 127.4, 129.6, 131.1, 142.0, 148.0, 152.1, 155.3.

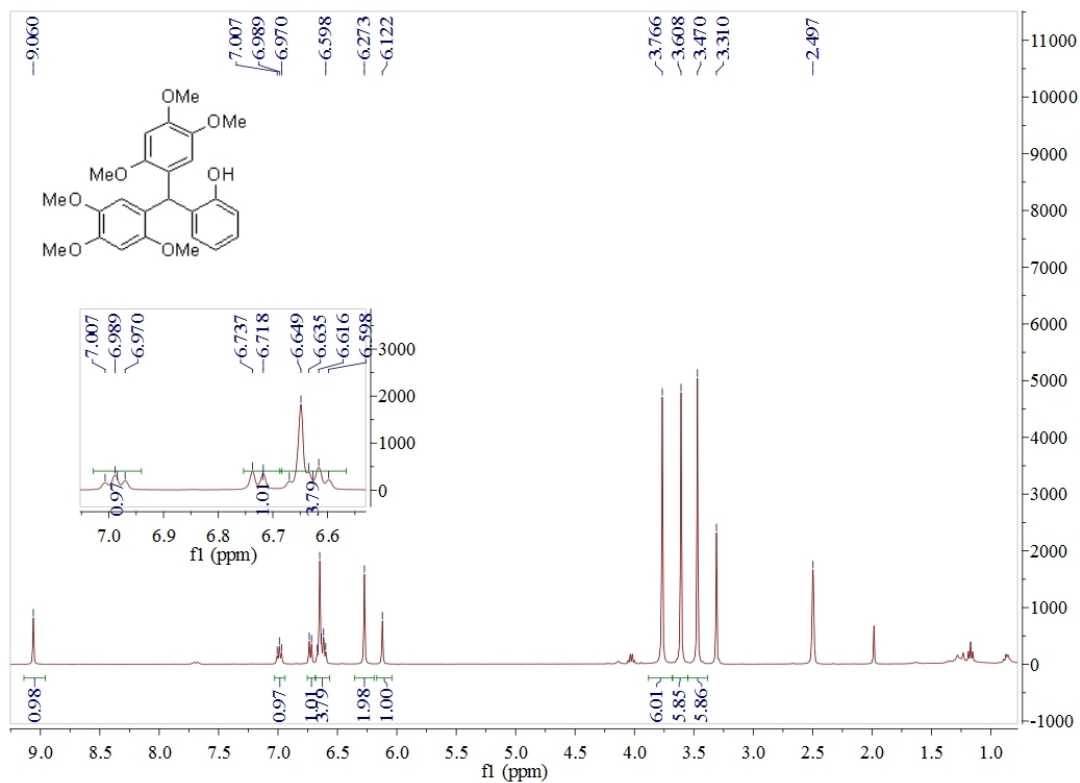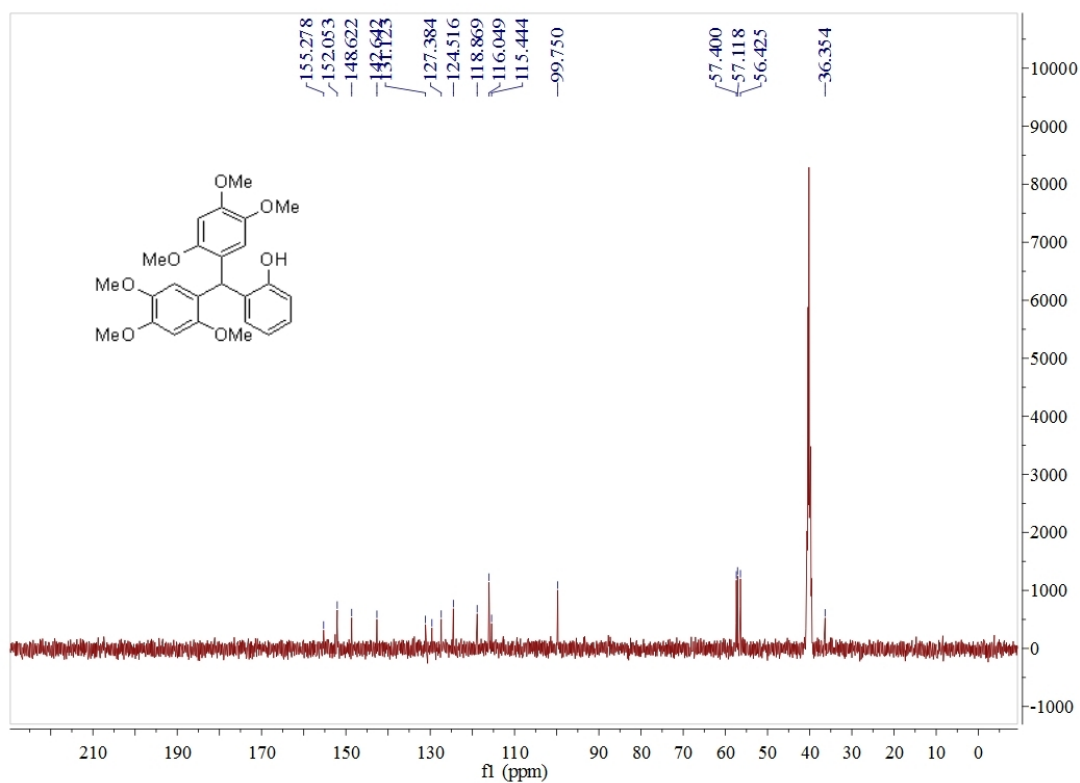

*bis(2,4,5-trimethoxyphenyl)methane (3i)*

White solid m.p.: 100-101 °C; <sup>1</sup>H NMR (400MHz; CDCl<sub>3</sub>): δ 3.76 (s, 6H), 3.82 (s, 6H), 3.85 (s, 2H), 3.88 (s, 6H), 6.55 (s, 2H), 6.67 (s, 2H); <sup>13</sup>C NMR (100MHz; CDCl<sub>3</sub>): δ 28.6, 56.0, 56.3, 56.4, 97.7, 114.5, 120.9, 142.7, 147.7, 151.4.

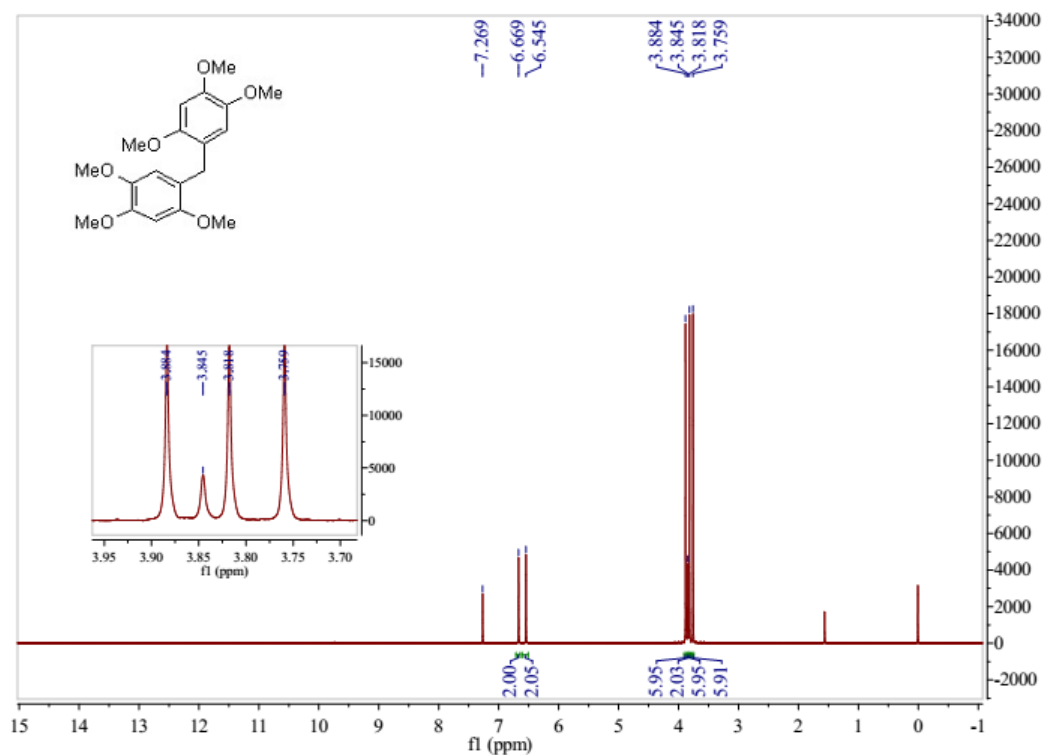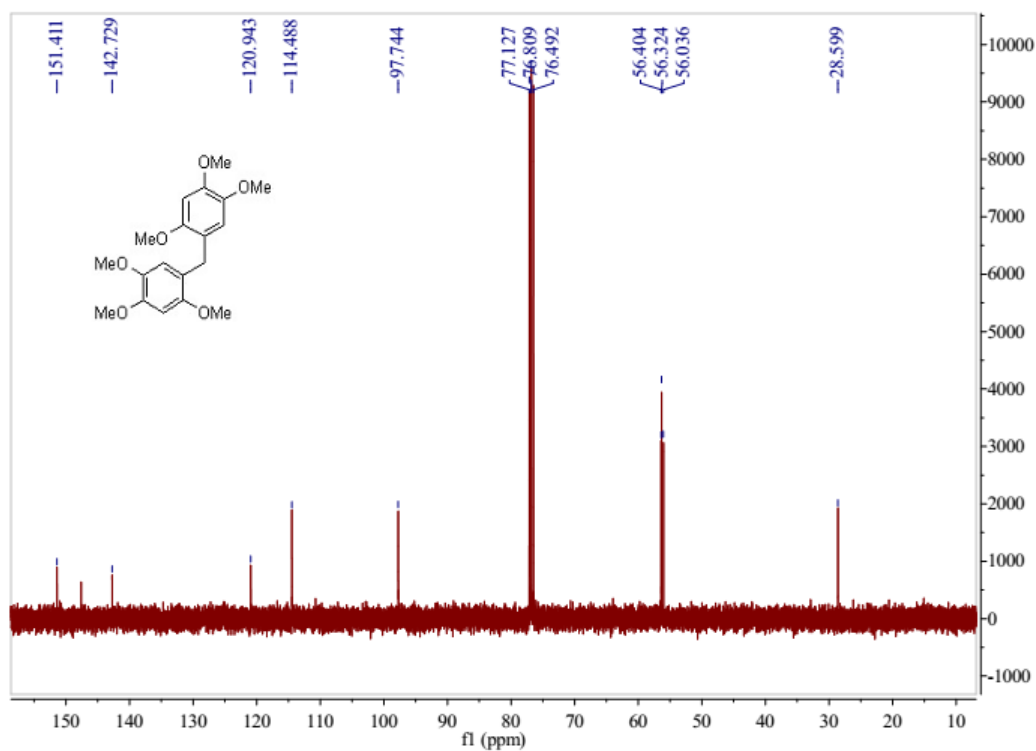

**5,5'-(cyclopentylmethylene)bis(1,2,4-trimethoxybenzene) (**3j**)**

Colorless oil;  $^1\text{H}$  NMR (400MHz;  $\text{CDCl}_3$ ):  $\delta$  0.85 (t,  $J = 6.6$  Hz, 3H), 1.29 (m, 6H), 1.89-1.92 (m, 2H), 3.74 (s, 6H), 3.85 (s, 6H), 4.57 (t,  $J = 7.8$  Hz, 1H), 6.50 (s, 2H), 6.80 (s, 2H);  $^{13}\text{C}$  NMR (100MHz;  $\text{CDCl}_3$ ):  $\delta$  13.9, 22.3, 27.5, 31.7, 34.3, 36.4, 98.4, 112.9, 125.5, 142.7, 147.4, 151.5.

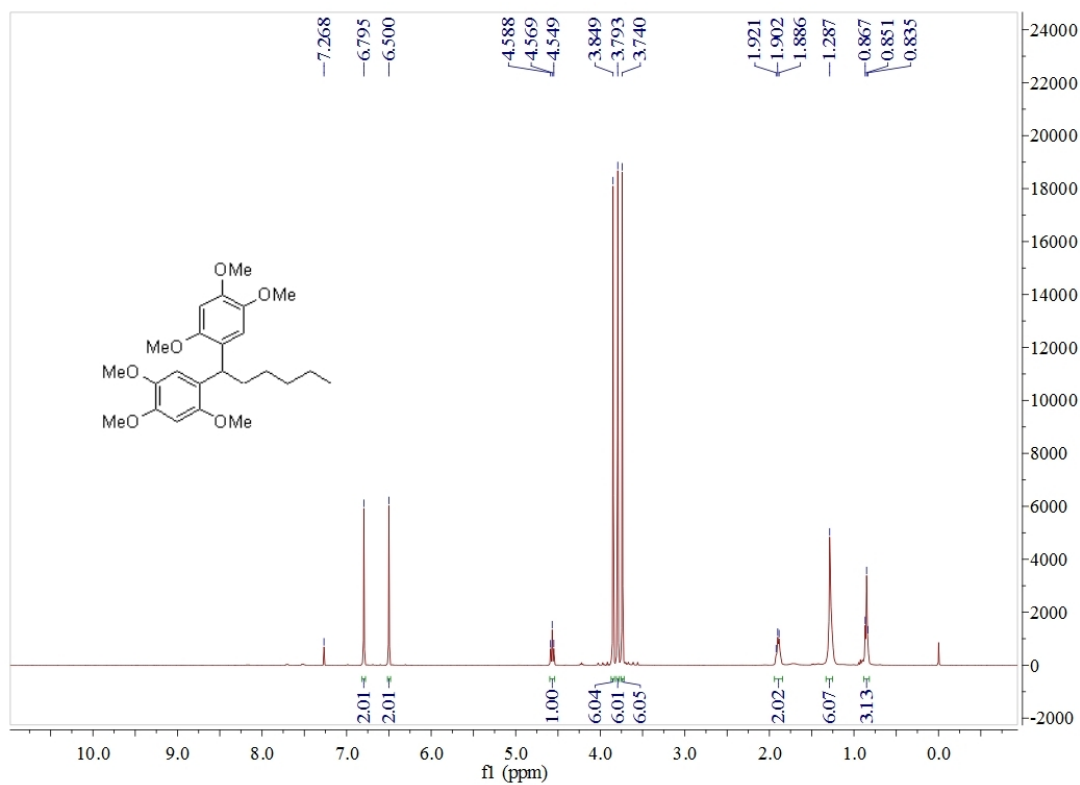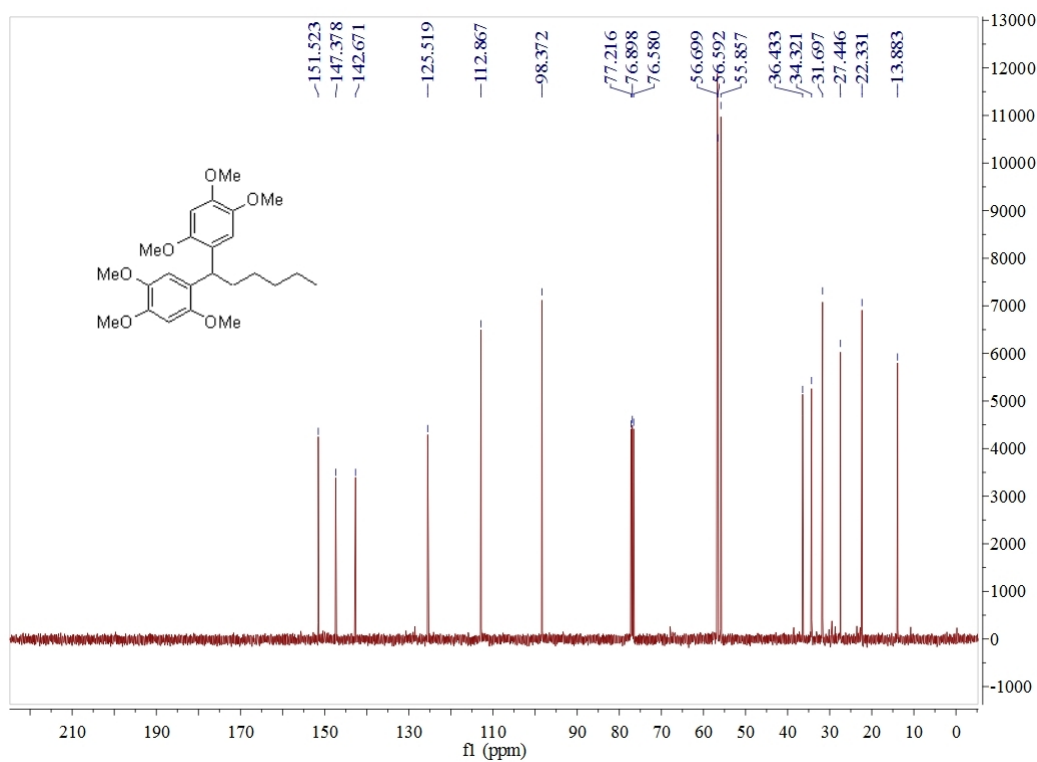

5,5'-(butane-1,1-diyl)bis(1,2,4-trimethoxybenzene)(**3k**)

Colorless liquid;  $^1\text{H}$  NMR (500MHz;  $\text{CDCl}_3$ ):  $\delta$  0.91 (t,  $J = 6.6$  Hz, 3H), 1.29 (m, 2H), 1.89 (dd,  $J_1=10\text{Hz}$ ,  $J_2=15\text{Hz}$ , 2H), 3.74 (s, 6H), 3.80 (s, 6H), 3.85 (s, 6H), 4.59 (t,  $J=10\text{Hz}$ , 1H), 6.50 (s, 2H), 6.80 (s, 2H);  $^{13}\text{C}$  NMR (125MHz;  $\text{CDCl}_3$ ):  $\delta$  14.19, 21.15, 36.35, 36.92, 56.08, 56.79, 56.96, 98.54, 112.99, 125.73, 142.88, 147.56, 151.71.

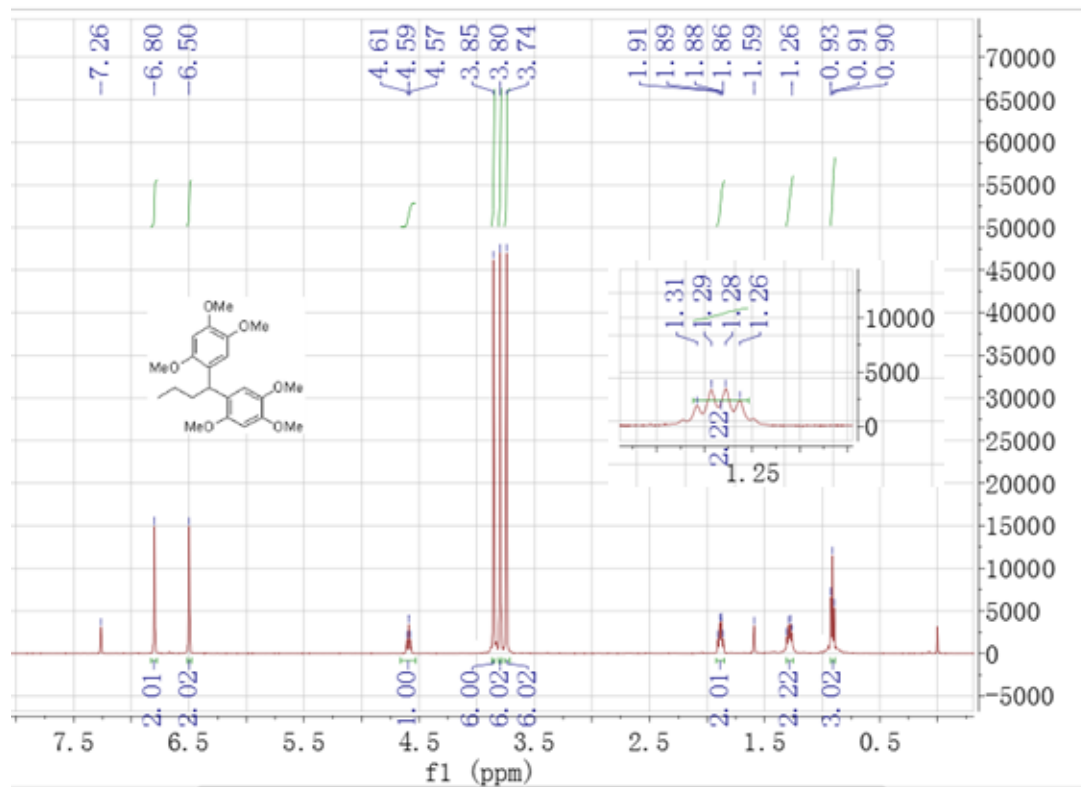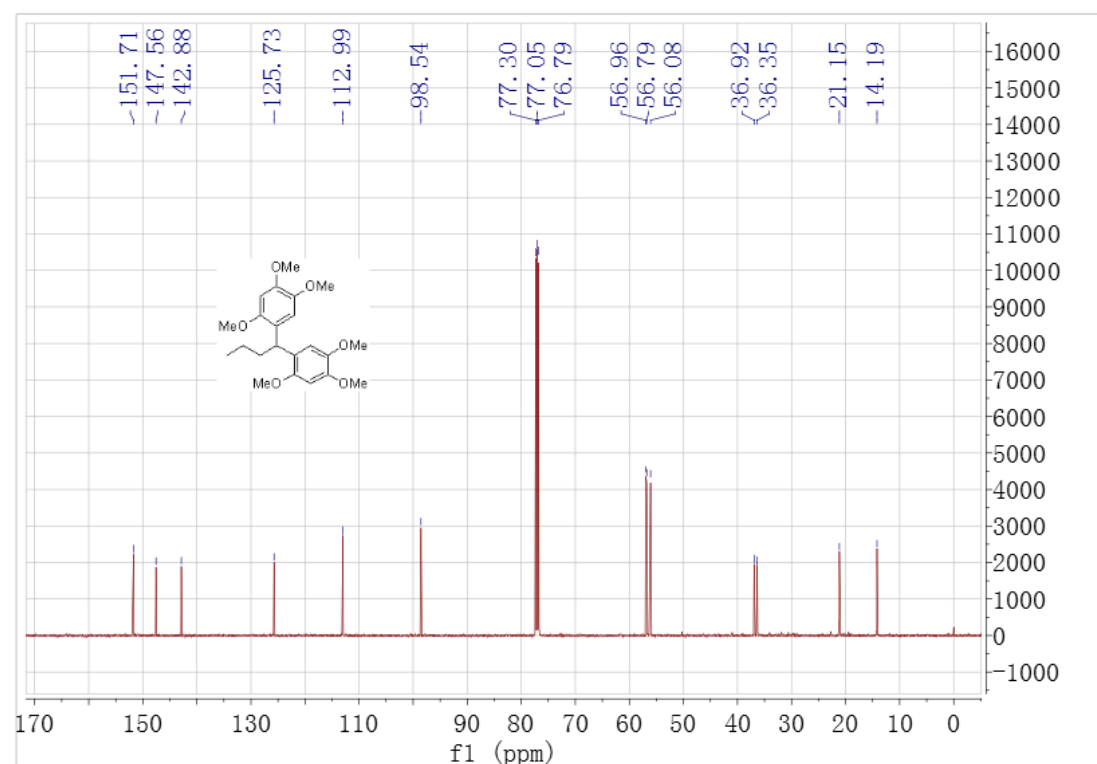

**5,5'-(2-methylpropane-1,1-diyl)bis(1,2,4-trimethoxybenzene)(3I)**

Colorless liquid;  $^1\text{H NMR}$  (500MHz;  $\text{CDCl}_3$ ):  $\delta$  0.79 (s, 3H), 0.80 (s, 3H), 2.40 (m, 1H), 3.69 (s, 6H), 3.75 (s, 1H), 3.76 (s, 6H), 4.12 (d,  $J=10\text{Hz}$ , 1H), 6.40 (s, 2H), 6.87 (s, 2H);  $^{13}\text{C NMR}$  (125MHz;  $\text{CDCl}_3$ ):  $\delta$  20.59, 29.87, 44.07, 54.99, 55.68, 55.83, 97.35, 112.35, 124.17, 141.87, 146.41, 150.81.

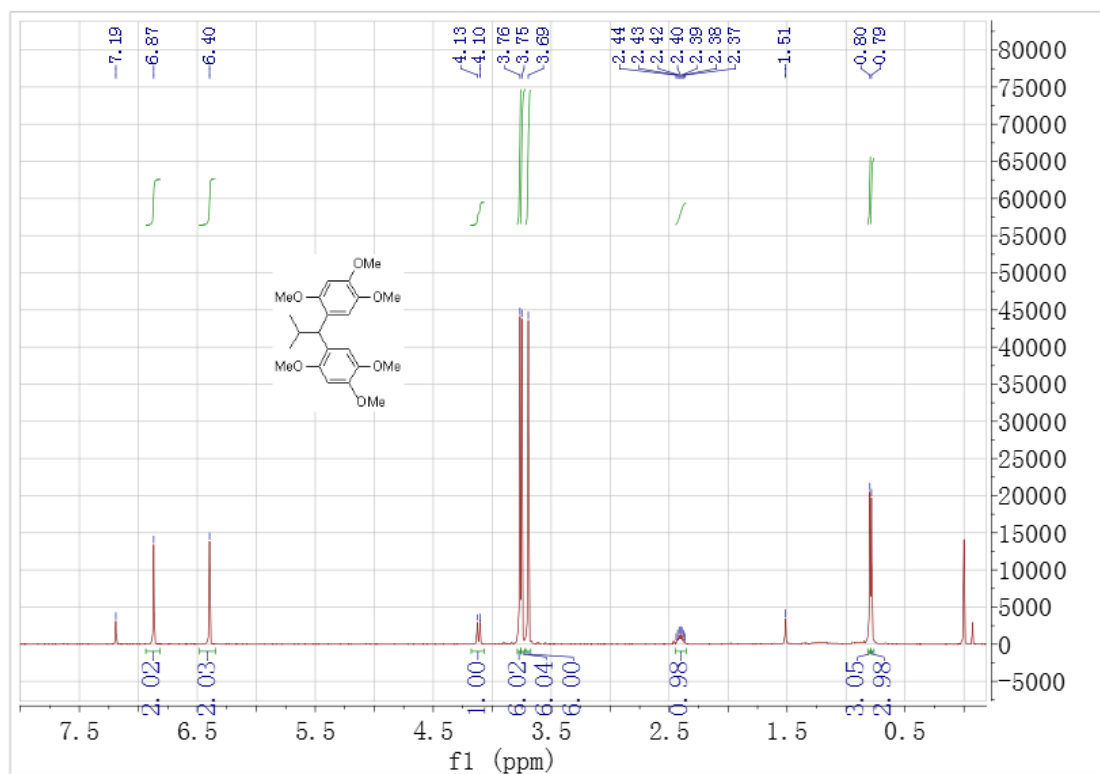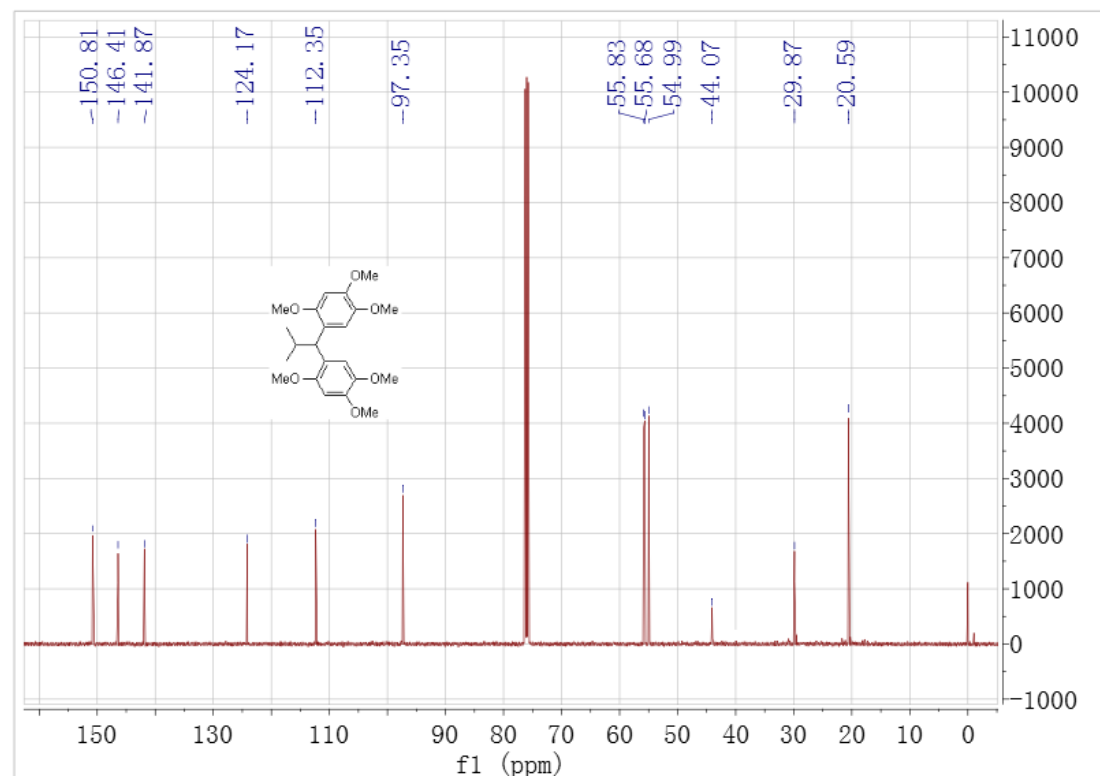

**4,4'-(phenylmethylene)bis(1,3-dimethoxybenzene)(3m)**

White solid m.p.:132-133 °C;  $^1\text{H}$  NMR (500MHz;  $\text{DMSO-d}_6$ ):  $\delta$  3.64 (s, 6H), 3.72 (s, 6H), 5.90 (s, 1H), 6.41 (dd,  $J=10$  Hz,2H), 6.53-6.56 (m, 4H), 6.92 (d,  $J=10$  Hz, 2H), 7.13-7.16 (m, 1H), 7.21-7.24 (m, 1H);  $^{13}\text{C}$  NMR (125MHz;  $\text{DMSO-d}_6$ ):  $\delta$  41.8, 55.5, 56.0, 99.0, 104.6, 124.6, 126.1, 128.4, 129.2, 144.8, 158.0, 159.4. HRMS Calcd for  $\text{C}_{23}\text{H}_{24}\text{O}_4$ :  $[\text{M}+\text{H}]^+$ , 365.1747; Found: 365.1746.

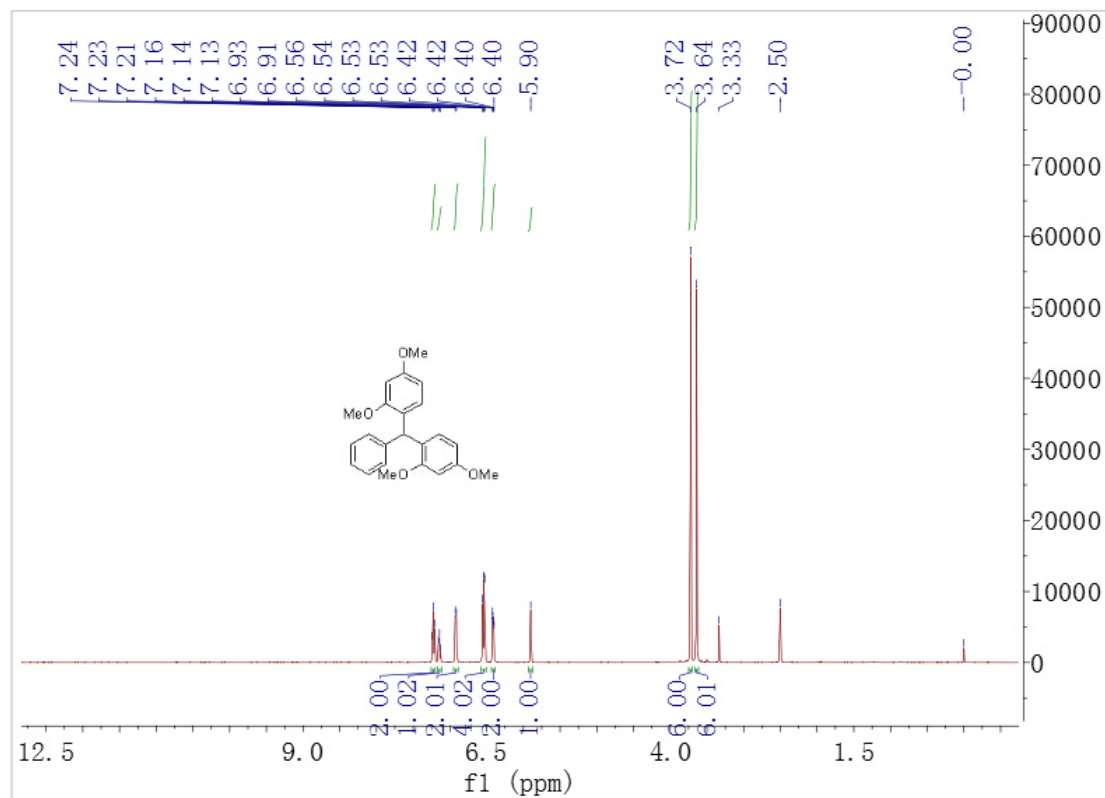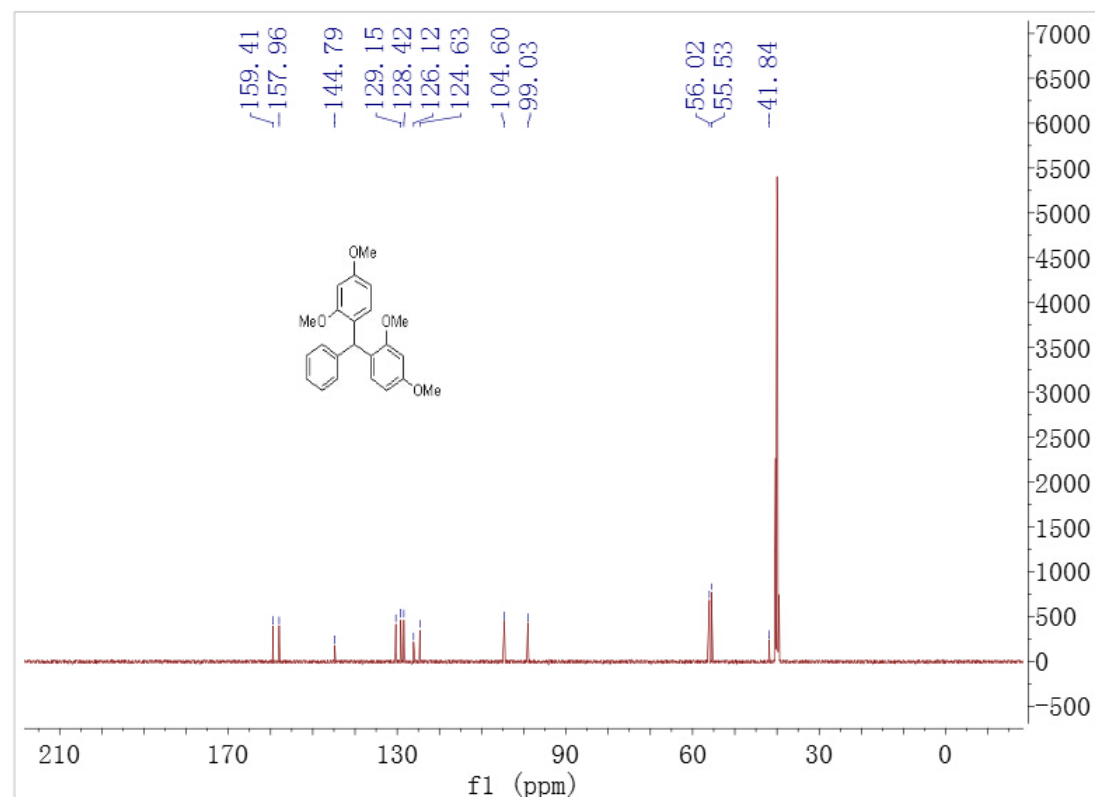

**4,4'-(phenylmethylene)bis(1,2-dimethoxybenzene)(3n)**

White solid m.p.: 123-124 °C;  $^1\text{H}$  NMR (400MHz;  $\text{CDCl}_3$ ):  $\delta$  3.77 (s, 6H), 3.87 (s, 6H), 5.45 (s, 1H), 6.61 (dd,  $J_1 = 1.3\text{Hz}$ ,  $J_2 = 8.2\text{ Hz}$ , 2H), 6.68 (d,  $J = 1.5\text{ Hz}$ , 2H), 6.79 (d,  $J = 8.2\text{ Hz}$ , 2H), 7.12 (d,  $J = 7.2\text{ Hz}$ , 2H), 7.22 (t,  $J = 7.2\text{ Hz}$ , 1H), 7.29 (t,  $J = 7.2\text{ Hz}$ , 2H);  $^{13}\text{C}$  NMR (100MHz;  $\text{CDCl}_3$ ):  $\delta$  55.6, 55.7, 110.7, 112.6, 121.2, 126.1, 128.1, 129.1, 136.5, 144.1, 147.3, 148.6.

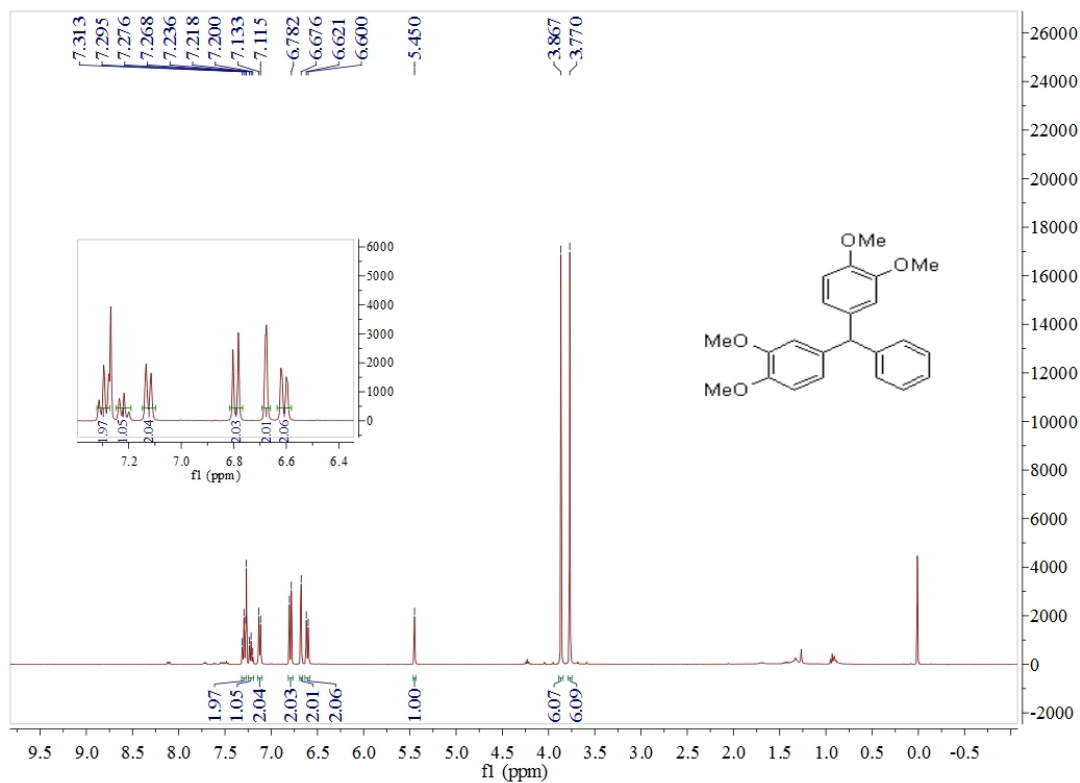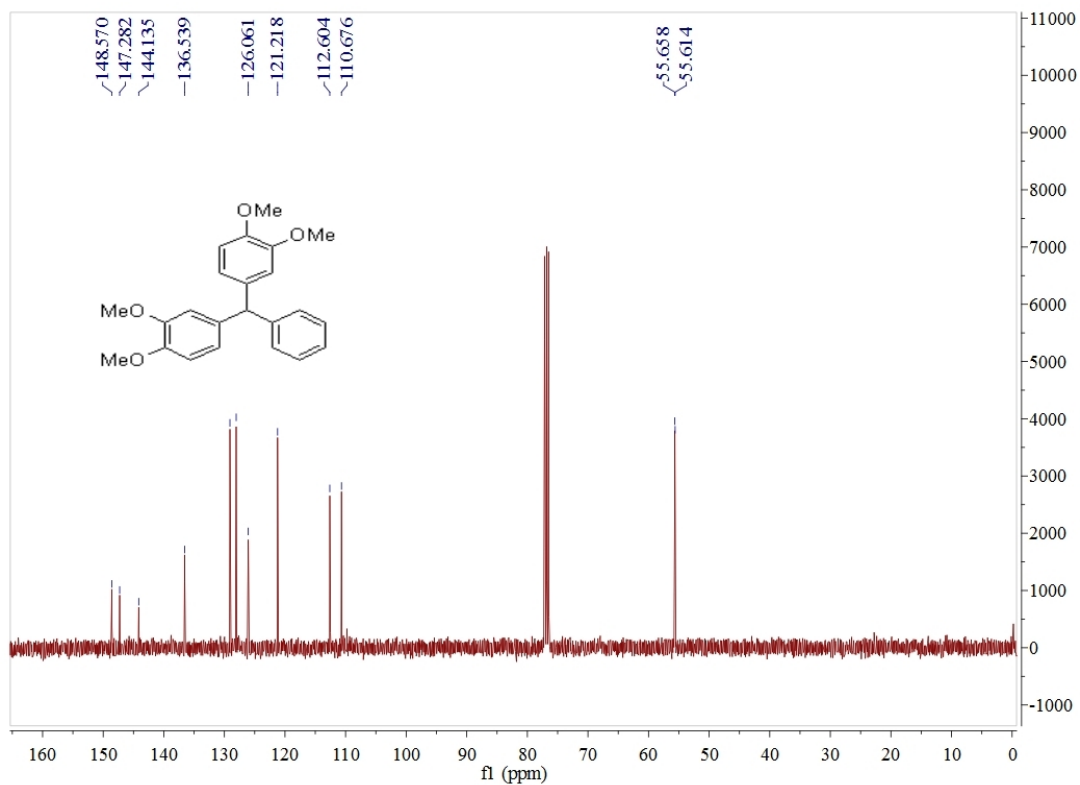

**4,4'-(phenylmethylene)bis(2-methoxyphenol)(3o)**

Yellow solid m.p.: 130-131 °C; <sup>1</sup>H NMR (400MHz; CDCl<sub>3</sub>): δ 3.78 (s, 6H), 5.43 (s, 1H), 5.54 (s, 2H), 6.58 (d, J = 8.0 Hz, 2H), 6.65 (s, 2H), 6.84 (d, J = 8.0 Hz, 2H), 7.13 (d, J = 8.0 Hz, 2H), 7.22 (m, 1H), 7.28 (m, 2H); <sup>13</sup>C NMR (100MHz; CDCl<sub>3</sub>): δ 55.7, 55.9, 111.8, 113.8, 122.0, 126.0, 128.0, 129.1, 136.0, 143.8, 144.3, 146.2.

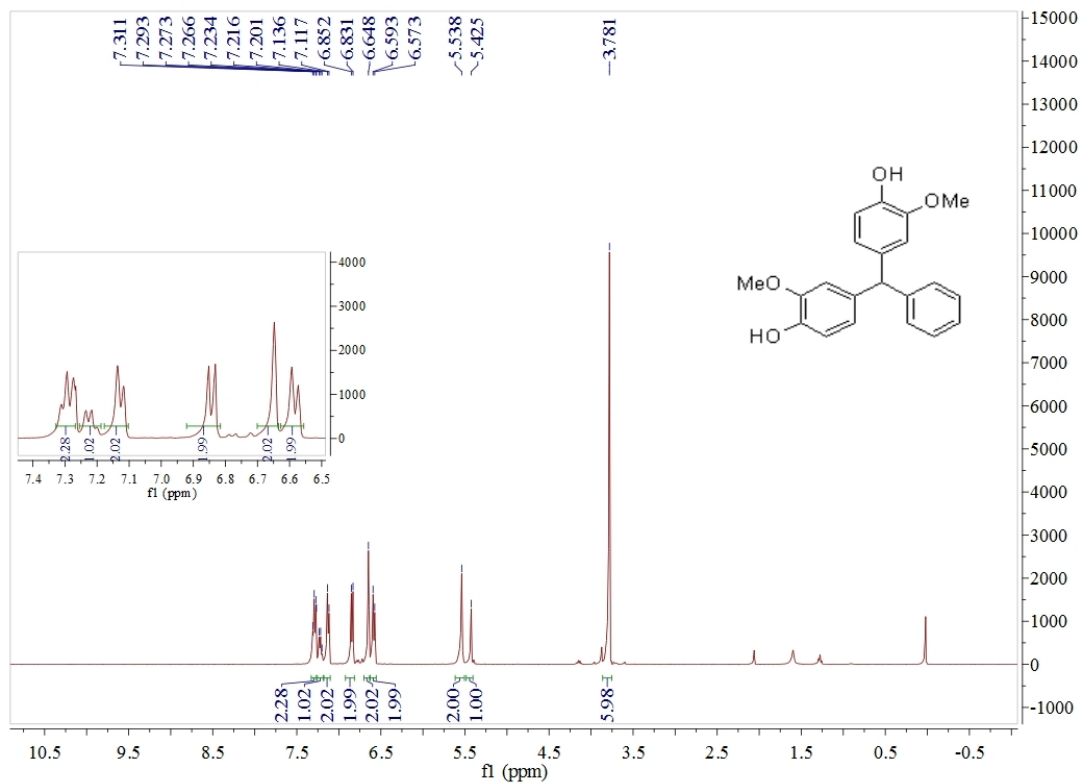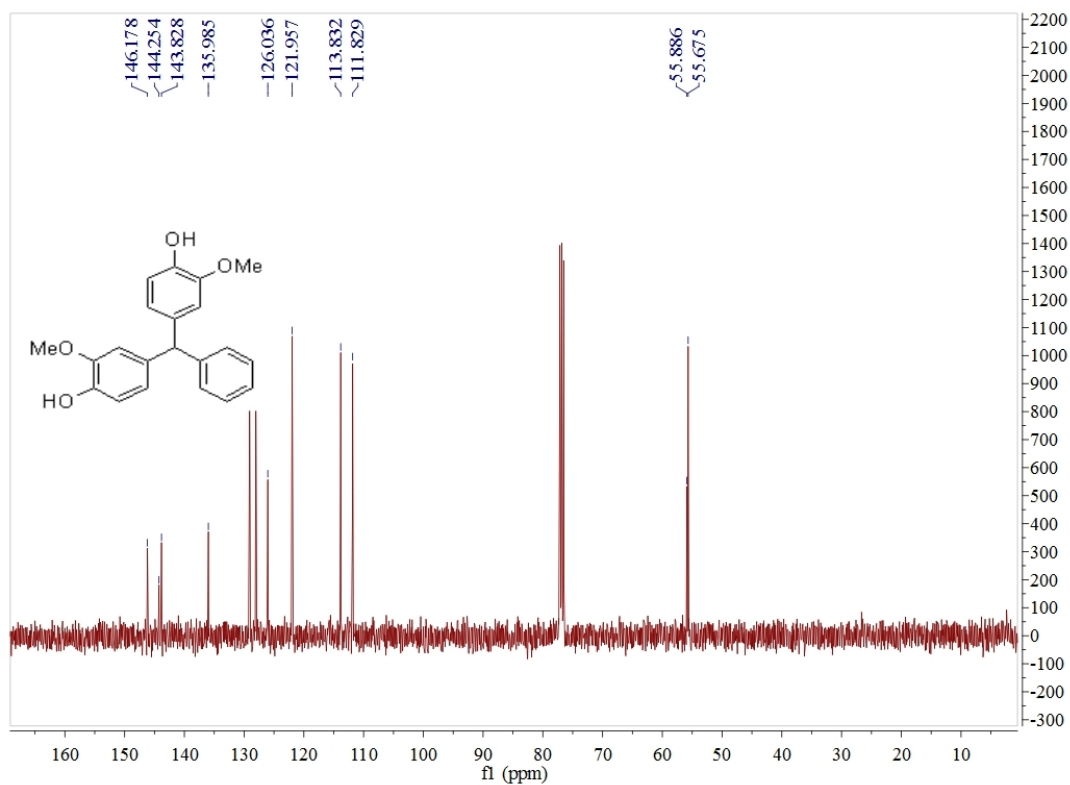



bis(4-hydroxyphenyl)-phenylmethane (**3p**)

Pink solid m.p.: 161-163 °C ;  $^1\text{H NMR}$  (400MHz;  $\text{CDCl}_3$ ):  $\delta$  4.62 (s, 2H), 5.43 (s, 1H), 6.70 (d,  $J = 8.6$  Hz, 4H), 6.97 (d,  $J = 8.4$  Hz, 4H), 7.09-7.11 (d,  $J = 7.2$  Hz, 2H), 7.21 (t,  $J = 7.2$  Hz, 1H), 7.28 (t,  $J = 7.1$ Hz, 2H):  
 $^{13}\text{C NMR}$  (100MHz;  $\text{CDCl}_3$ ):  $\delta$  55.0, 114.9, 126.0, 128.1, 129.1, 130.3, 136.4, 144.3, 153.6.

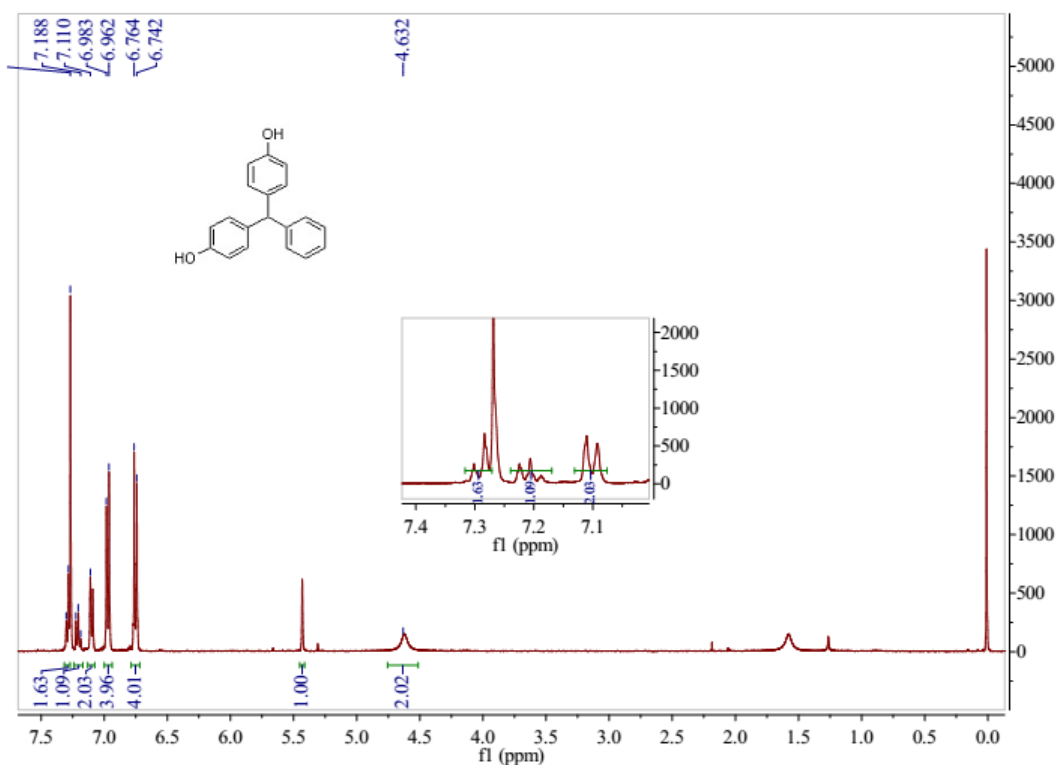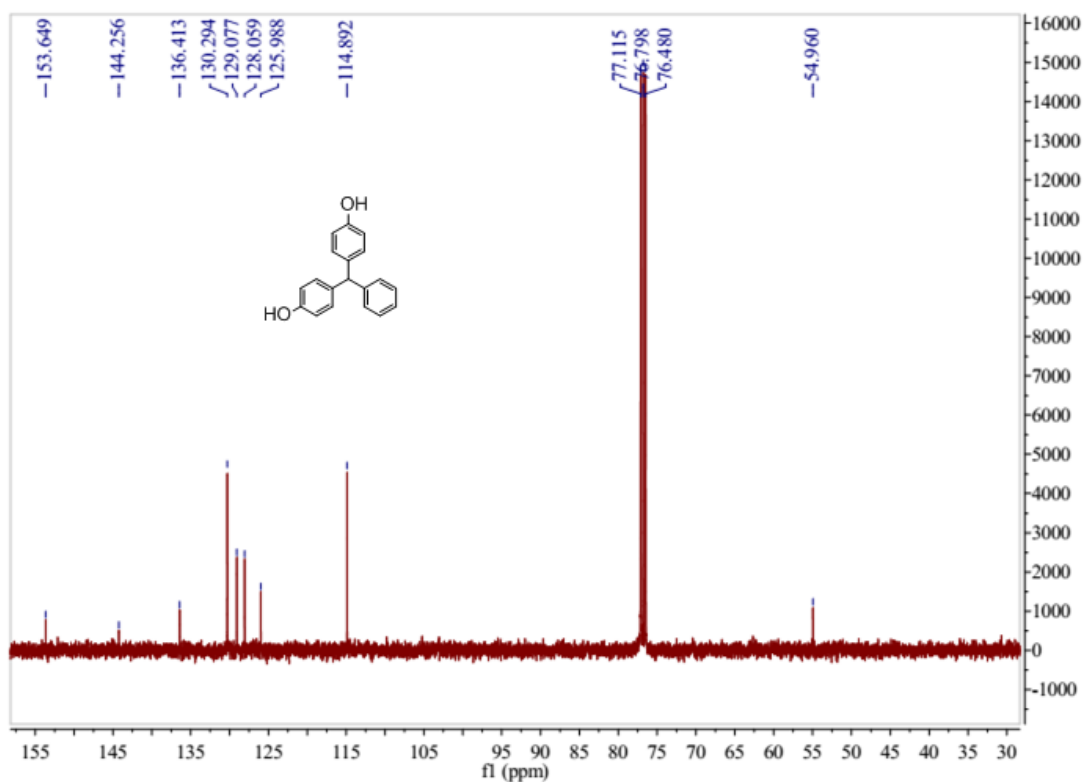

Supplement: c5ra08950f1.pdf [file c5ra08950f1.pdf]
